# Supplementary material
Source: MDPI journal article supplement (https://www.mdpi.com/2075-163X/11/9/932)
Supplement: s1 [file s1]

## Supplementary Materials

**Table S1.** Recipes for the synthetic Opalinus clay pore water [23] and diluted cap rock solution [24] used for the batch experiments and the substrates added to selected samples for stimulating microbial processes. AQDS = Anthraquinone-2,6-disulfonate

| Additives                   | Chemical formula                                             | Opalinus clay pore water (OPA) | Diluted cap rock solution (CAP) |
|-----------------------------|--------------------------------------------------------------|--------------------------------|---------------------------------|
|                             |                                                              | mol·L <sup>-1</sup>            | mol·L <sup>-1</sup>             |
| pH                          |                                                              | 7.8                            | 7.3                             |
| Sodium chloride             | NaCl                                                         | 0.212                          | 2.496                           |
| Calcium chloride            | CaCl <sub>2</sub>                                            | 0.026                          | 0.032                           |
| Sodium sulfate              | Na <sub>2</sub> SO <sub>4</sub>                              | 0.014                          | 0.038                           |
| Potassium chloride          | KCl                                                          | 0.002                          | 0.005                           |
| Magnesium chloride          | MgCl <sub>2</sub>                                            | 0.017                          | -                               |
| Strontium chloride          | SrCl <sub>2</sub>                                            | 0.0005                         | -                               |
| Sodium hydrogen carbonate   | NaHCO <sub>3</sub>                                           | 0.0005                         | -                               |
| Total                       |                                                              | 0.27                           | 2.57                            |
| Sodium lactate <sup>1</sup> | C <sub>3</sub> H <sub>5</sub> NaO <sub>3</sub>               | 0.05                           | 0.05                            |
| Sodium acetate <sup>1</sup> | C <sub>2</sub> H <sub>3</sub> NaO <sub>2</sub>               | 0.05                           | 0.05                            |
| Methanol <sup>1</sup>       | CH <sub>3</sub> OH                                           | 0.003                          | 0.003                           |
| AQDS <sup>1</sup>           | C <sub>14</sub> H <sub>6</sub> O <sub>8</sub> S <sub>2</sub> | 0.0001                         | 0.0001                          |

<sup>1</sup> substrate added to selected samples

**Table S2.** XRF results of main elements of bentonite SD80. DUR: duration; T: temperature; SOL: solution; S: substrate; LOI: loss-on-ignition, OPA: Opalinus clay pore water, CAP: diluted cap rock solution.

| Sample ID |       | DUR | T    | SOL | S | LOI   | SiO <sub>2</sub> | Al <sub>2</sub> O <sub>3</sub> | Fe <sub>2</sub> O <sub>3</sub> | MgO   | CaO   | K <sub>2</sub> O | TiO <sub>2</sub> | Na <sub>2</sub> O | MnO   | P <sub>2</sub> O <sub>5</sub> | SO <sub>3</sub> | Cl    | F     | sum   |
|-----------|-------|-----|------|-----|---|-------|------------------|--------------------------------|--------------------------------|-------|-------|------------------|------------------|-------------------|-------|-------------------------------|-----------------|-------|-------|-------|
|           |       | [a] | [°C] |     |   | wt. % | wt. %            | wt. %                          | wt. %                          | wt. % | wt. % | wt. %            | wt. %            | wt. %             | wt. % | wt. %                         | wt. %           | wt. % | wt. % | wt. % |
| SD80      | raw   | 0   | 20   | -   | - | 16.5  | 51.7             | 17.9                           | 4.8                            | 2.9   | 2.5   | 0.9              | 0.7              | 0.7               | 0.1   | 0.2                           | <0.05           | <0.05 | <0.05 | 99.4  |
| SD80      | 35974 | 1   | 25   | OPA | - | 13.6  | 52.5             | 18.2                           | 4.8                            | 2.8   | 2.8   | 1.0              | 0.8              | 0.3               | 0.1   | 0.1                           | <0.05           | <0.05 | <0.05 | 97.2  |
| SD80      | 35962 | 1   | 25   | OPA | + | 13.4  | 52.8             | 18.3                           | 4.8                            | 2.9   | 2.4   | 0.9              | 0.8              | 0.1               | 0.1   | 0.2                           | 0.16            | <0.05 | <0.05 | 97.2  |
| SD80      | 35976 | 1   | 90   | OPA | - | 12.8  | 55.7             | 19.3                           | 5.0                            | 3.3   | 2.4   | 0.9              | 0.8              | 0.2               | 0.1   | 0.2                           | 0.09            | <0.05 | 0.09  | 101.2 |
| SD80      | 35964 | 1   | 90   | OPA | + | 12.9  | 52.9             | 18.2                           | 4.9                            | 2.9   | 2.5   | 0.9              | 0.8              | 0.1               | 0.1   | 0.2                           | 0.22            | <0.05 | 0.07  | 97.1  |
| SD80      | 35977 | 2   | 25   | OPA | - | 14.3  | 53.2             | 18.5                           | 4.8                            | 2.9   | 2.1   | 0.9              | 0.8              | 0.1               | 0.1   | 0.2                           | <0.05           | <0.05 | <0.05 | 98.1  |
| SD80      | 35965 | 2   | 25   | OPA | + | 13.8  | 52.3             | 18.2                           | 4.9                            | 2.9   | 2.6   | 0.9              | 0.8              | 0.1               | 0.1   | 0.2                           | 0.39            | <0.05 | <0.05 | 97.5  |
| SD80      | 35967 | 2   | 90   | OPA | + | 21.1  | 47.1             | 16.2                           | 4.4                            | 2.6   | 2.4   | 0.8              | 0.7              | 0.3               | 0.1   | 0.2                           | 0.09            | <0.05 | <0.05 | 96.5  |
| SD80      | 35950 | 1   | 25   | CAP | - | 18.0  | 53.2             | 18.3                           | 4.8                            | 2.7   | 1.9   | 1.0              | 0.8              | 0.2               | 0.1   | 0.1                           | 0.07            | <0.05 | <0.05 | 101.4 |
| SD80      | 35938 | 1   | 25   | CAP | + | 11.5  | 54.8             | 18.9                           | 5.0                            | 2.7   | 2.1   | 1.0              | 0.8              | 0.7               | 0.1   | 0.2                           | <0.05           | <0.05 | 0.13  | 98.2  |
| SD80      | 35952 | 1   | 90   | CAP | - | 18.2  | 52.2             | 18.0                           | 4.8                            | 2.7   | 2.1   | 1.0              | 0.8              | 0.4               | 0.1   | 0.2                           | <0.05           | <0.05 | <0.05 | 100.8 |
| SD80      | 35940 | 1   | 90   | CAP | + | 11.1  | 52.2             | 18.1                           | 4.8                            | 2.6   | 1.9   | 0.9              | 0.8              | 0.7               | 0.1   | 0.2                           | 0.06            | <0.05 | 0.06  | 94.0  |
| SD80      | 35953 | 2   | 25   | CAP | - | 11.9  | 54.7             | 18.8                           | 5.0                            | 2.7   | 1.9   | 1.0              | 0.8              | 0.8               | 0.1   | 0.2                           | 0.05            | <0.05 | <0.05 | 98.3  |
| SD80      | 35941 | 2   | 25   | CAP | + | 11.5  | 49.6             | 17.4                           | 4.6                            | 2.5   | 1.8   | 0.8              | 0.7              | 0.7               | 0.1   | 0.2                           | <0.05           | <0.05 | <0.05 | 90.3  |
| SD80      | 35955 | 2   | 90   | CAP | - | 11.6  | 54.1             | 18.7                           | 5.0                            | 2.7   | 2.2   | 1.0              | 0.8              | 0.9               | 0.1   | 0.2                           | 0.06            | <0.05 | 0.05  | 98.1  |
| SD80      | 35943 | 2   | 90   | CAP | + | 12.1  | 54.7             | 18.9                           | 4.9                            | 2.8   | 2.1   | 1.0              | 0.8              | 0.7               | 0.1   | 0.2                           | 0.07            | <0.05 | <0.05 | 98.7  |

**Table S3.** XRF results of main elements of bentonite B36. DUR: duration; T: temperature; SOL: solution; S: substrate; LOI: loss-on-ignition, OPA: Opalinus clay pore water, CAP: diluted cap rock solution.

| Sample ID |       | DUR | T    | SOL | S | LOI   | SiO <sub>2</sub> | Al <sub>2</sub> O <sub>3</sub> | Fe <sub>2</sub> O <sub>3</sub> | MgO   | CaO   | K <sub>2</sub> O | TiO <sub>2</sub> | Na <sub>2</sub> O | MnO   | P <sub>2</sub> O <sub>5</sub> | SO <sub>3</sub> | Cl    | F     | sum   |
|-----------|-------|-----|------|-----|---|-------|------------------|--------------------------------|--------------------------------|-------|-------|------------------|------------------|-------------------|-------|-------------------------------|-----------------|-------|-------|-------|
|           |       | [a] | [°C] |     |   | wt. % | wt. %            | wt. %                          | wt. %                          | wt. % | wt. % | wt. %            | wt. %            | wt. %             | wt. % | wt. %                         | wt. %           | wt. % | wt. % | wt. % |
| B36       | raw   | 0   | 20   | -   | - | 13.9  | 58.6             | 16.3                           | 7.4                            | 1.5   | 1.2   | 1.5              | 0.8              | 0.4               | 0.1   | 0.1                           | <0.05           | <0.05 | 0.06  | 101.8 |
| B36       | 35968 | 1   | 25   | OPA | - | 15.8  | 56.9             | 15.8                           | 6.9                            | 1.3   | 1.1   | 1.5              | 0.8              | 0.5               | 0.1   | 0.1                           | <0.05           | <0.05 | 0.08  | 100.8 |
| B36       | 35956 | 1   | 25   | OPA | + | 9.9   | 57.7             | 16.4                           | 7.4                            | 1.4   | 1.1   | 1.4              | 0.7              | 0.4               | 0.1   | 0.1                           | <0.05           | <0.05 | <0.05 | 96.6  |
| B36       | 35970 | 1   | 90   | OPA | - | 10.0  | 61.0             | 17.4                           | 7.7                            | 1.6   | 1.2   | 1.5              | 0.8              | 0.5               | 0.1   | 0.1                           | <0.05           | <0.05 | 0.09  | 101.9 |
| B36       | 35958 | 1   | 90   | OPA | + | 10.0  | 57.5             | 16.8                           | 7.6                            | 1.5   | 1.1   | 1.4              | 0.7              | 0.4               | 0.1   | 0.1                           | <0.05           | <0.05 | <0.05 | 97.3  |
| B36       | 35971 | 2   | 25   | OPA | - | 11.6  | 56.8             | 16.3                           | 7.3                            | 1.4   | 1.0   | 1.4              | 0.7              | 0.4               | 0.1   | 0.1                           | <0.05           | <0.05 | <0.05 | 97.2  |
| B36       | 35959 | 2   | 25   | OPA | + | 16.9  | 52.5             | 15.7                           | 7.0                            | 1.5   | 1.1   | 1.2              | 0.6              | 0.3               | 0.1   | 0.1                           | <0.05           | <0.05 | <0.05 | 97.1  |
| B36       | 35961 | 2   | 90   | OPA | + | 14.4  | 55.1             | 15.2                           | 6.7                            | 1.4   | 1.0   | 1.4              | 0.8              | 0.5               | 0.1   | 0.1                           | <0.05           | <0.05 | 0.05  | 96.7  |
| B36       | 35944 | 1   | 25   | CAP | - | 15.3  | 57.6             | 16.3                           | 7.2                            | 1.4   | 1.1   | 1.4              | 0.8              | 0.5               | 0.1   | 0.1                           | <0.05           | <0.05 | <0.05 | 101.9 |
| B36       | 35932 | 1   | 25   | CAP | + | 9.3   | 56.8             | 17.2                           | 7.9                            | 1.4   | 0.8   | 1.3              | 0.6              | 0.9               | 0.1   | 0.1                           | <0.05           | <0.05 | <0.05 | 96.4  |
| B36       | 35946 | 1   | 90   | CAP | - | 12.0  | 58.9             | 16.7                           | 7.4                            | 1.3   | 0.8   | 1.5              | 0.8              | 0.9               | 0.1   | 0.1                           | <0.05           | <0.05 | <0.05 | 100.6 |
| B36       | 35934 | 1   | 90   | CAP | + | 8.6   | 58.6             | 17.3                           | 7.8                            | 1.4   | 0.9   | 1.4              | 0.7              | 1.0               | 0.1   | 0.1                           | <0.05           | <0.05 | 0.08  | 98.0  |
| B36       | 35947 | 2   | 25   | CAP | - | 8.1   | 59.6             | 17.0                           | 7.5                            | 1.3   | 0.7   | 1.5              | 0.8              | 1.2               | 0.1   | 0.1                           | <0.05           | <0.05 | <0.05 | 97.9  |
| B36       | 35935 | 2   | 25   | CAP | + | 8.8   | 59.1             | 17.4                           | 7.8                            | 1.4   | 0.8   | 1.4              | 0.7              | 1.1               | 0.1   | 0.1                           | <0.05           | <0.05 | 0.12  | 98.9  |
| B36       | 35949 | 2   | 90   | CAP | - | 9.1   | 59.4             | 17.0                           | 7.5                            | 1.3   | 0.7   | 1.5              | 0.7              | 1.2               | 0.1   | 0.1                           | <0.05           | <0.05 | 0.05  | 98.8  |
| B36       | 35937 | 2   | 90   | CAP | + | 9.4   | 57.9             | 17.3                           | 7.8                            | 1.4   | 0.8   | 1.4              | 0.6              | 1.1               | 0.1   | 0.1                           | <0.05           | <0.05 | <0.05 | 97.9  |

**Table S4.** EDX measurement statistics of smectite SD80 by collecting three spatially independent maps to determine sample homogeneity (values are rounded). DUR: duration, SOL: solution, S: substrate (Na-lactate, Na-acetate, methanol, AQDS), OPA: Opalinus clay pore water, CAP: diluted cap rock solution.

| Sample ID |       | DUR | T    | SOL | S | SiO <sub>2</sub> |      | Al <sub>2</sub> O <sub>3</sub> |      | Fe <sub>2</sub> O <sub>3</sub> |      | MgO  |      | CaO  |      | K <sub>2</sub> O |      | Na <sub>2</sub> O |      |
|-----------|-------|-----|------|-----|---|------------------|------|--------------------------------|------|--------------------------------|------|------|------|------|------|------------------|------|-------------------|------|
|           |       | [a] | [°C] |     |   | mean             | STD  | mean                           | STD  | mean                           | STD  | mean | STD  | mean | STD  | mean             | STD  | mean              | STD  |
|           |       |     |      |     |   | [%]              | [%]  | [%]                            | [%]  | [%]                            | [%]  | [%]  | [%]  | [%]  | [%]  | [%]              | [%]  | [%]               | [%]  |
| SD80      | raw   | 0   | 20   | -   | - | 66.57            | 0.04 | 21.43                          | 0.04 | 5.87                           | 0.06 | 4.13 | 0.01 | 1.48 | 0.01 | 0.42             | 0.01 | 0.09              | 0.01 |
| SD80      | 35974 | 1   | 25   | OPA | - | 66.35            | 0.28 | 21.41                          | 0.10 | 5.53                           | 0.27 | 3.86 | 0.04 | 2.24 | 0.04 | 0.42             | 0.02 | 0.19              | 0.02 |
| SD80      | 35962 | 1   | 25   | OPA | + | 66.70            | 0.05 | 21.58                          | 0.03 | 5.31                           | 0.07 | 4.02 | 0.00 | 1.92 | 0.00 | 0.39             | 0.00 | 0.08              | 0.00 |
| SD80      | 35976 | 1   | 90   | OPA | - | 66.64            | 0.06 | 21.33                          | 0.06 | 5.46                           | 0.09 | 4.08 | 0.00 | 1.93 | 0.02 | 0.44             | 0.01 | 0.11              | 0.00 |
| SD80      | 35964 | 1   | 90   | OPA | + | 66.19            | 0.03 | 21.70                          | 0.06 | 5.24                           | 0.10 | 4.24 | 0.03 | 2.16 | 0.03 | 0.37             | 0.00 | 0.11              | 0.01 |
| SD80      | 35977 | 2   | 25   | OPA | - | 66.18            | 0.05 | 21.73                          | 0.01 | 5.14                           | 0.04 | 4.16 | 0.01 | 2.21 | 0.02 | 0.44             | 0.00 | 0.13              | 0.00 |
| SD80      | 35965 | 2   | 25   | OPA | + | 66.08            | 0.13 | 22.15                          | 0.04 | 5.12                           | 0.07 | 4.15 | 0.02 | 2.03 | 0.03 | 0.38             | 0.01 | 0.10              | 0.00 |
| SD80      | 35979 | 2   | 90   | OPA | - | 66.44            | 0.06 | 21.98                          | 0.05 | 4.96                           | 0.08 | 4.14 | 0.01 | 1.80 | 0.02 | 0.45             | 0.01 | 0.23              | 0.01 |
| SD80      | 35967 | 2   | 90   | OPA | + | 66.44            | 0.02 | 22.00                          | 0.03 | 4.96                           | 0.02 | 4.14 | 0.01 | 1.87 | 0.02 | 0.40             | 0.00 | 0.19              | 0.01 |
| SD80      | 35950 | 1   | 25   | CAP | - | 66.76            | 0.01 | 22.55                          | 0.04 | 4.67                           | 0.06 | 3.75 | 0.01 | 1.79 | 0.00 | 0.36             | 0.01 | 0.11              | 0.00 |
| SD80      | 35938 | 1   | 25   | CAP | + | 65.91            | 0.10 | 21.98                          | 0.10 | 5.08                           | 0.11 | 3.75 | 0.03 | 1.77 | 0.02 | 0.43             | 0.00 | 1.07              | 0.06 |
| SD80      | 35952 | 1   | 90   | CAP | - | 66.26            | 0.01 | 22.35                          | 0.01 | 4.99                           | 0.02 | 3.92 | 0.00 | 1.94 | 0.01 | 0.47             | 0.01 | 0.06              | 0.01 |
| SD80      | 35940 | 1   | 90   | CAP | + | 66.02            | 0.02 | 22.26                          | 0.01 | 5.07                           | 0.02 | 3.92 | 0.02 | 1.82 | 0.00 | 0.61             | 0.01 | 0.30              | 0.01 |
| SD80      | 35953 | 2   | 25   | CAP | - | 66.10            | 0.14 | 21.63                          | 0.07 | 5.36                           | 0.04 | 3.61 | 0.04 | 1.74 | 0.04 | 0.43             | 0.01 | 1.13              | 0.05 |
| SD80      | 35941 | 2   | 25   | CAP | + | 66.00            | 0.01 | 21.90                          | 0.01 | 5.11                           | 0.02 | 3.75 | 0.01 | 1.78 | 0.02 | 0.43             | 0.00 | 1.03              | 0.01 |
| SD80      | 35955 | 2   | 90   | CAP | - | 65.45            | 0.08 | 21.95                          | 0.08 | 5.76                           | 0.09 | 4.05 | 0.04 | 1.91 | 0.01 | 0.61             | 0.01 | 0.28              | 0.01 |
| SD80      | 35943 | 2   | 90   | CAP | + | 65.77            | 0.10 | 21.99                          | 0.02 | 5.45                           | 0.08 | 4.01 | 0.02 | 1.92 | 0.01 | 0.63             | 0.00 | 0.23              | 0.01 |

**Table S5.** EDX measurement statistics for smectite B36 by collecting three spatially independent maps to determine sample homogeneity (values are rounded). DUR: duration, SOL: solution, S: substrate (Na-lactate, Na-acetate, methanol, AQDS), OPA: Opalinus clay pore water, CAP: diluted cap rock solution.

| Sample ID |       | DUR | T    | SOL | S | SiO <sub>2</sub> |      | Al <sub>2</sub> O <sub>3</sub> |      | Fe <sub>2</sub> O <sub>3</sub> |      | MgO  |      | CaO  |      | K <sub>2</sub> O |      | Na <sub>2</sub> O |      |
|-----------|-------|-----|------|-----|---|------------------|------|--------------------------------|------|--------------------------------|------|------|------|------|------|------------------|------|-------------------|------|
|           |       | [a] | [°C] |     |   | mean             | STD  | mean                           | STD  | mean                           | STD  | mean | STD  | mean | STD  | mean             | STD  | mean              | STD  |
|           |       |     |      |     |   | [%]              | [%]  | [%]                            | [%]  | [%]                            | [%]  | [%]  | [%]  | [%]  | [%]  | [%]              | [%]  | [%]               | [%]  |
| B36       | raw   | 0   | 20   | -   | - | 62.62            | 0.30 | 22.31                          | 0.25 | 10.20                          | 0.52 | 2.44 | 0.09 | 1.68 | 0.09 | 0.44             | 0.03 | 0.12              | 0.01 |
| B36       | 35968 | 1   | 25   | OPA | - | 63.04            | 0.19 | 22.38                          | 0.14 | 10.26                          | 0.19 | 2.38 | 0.03 | 1.38 | 0.08 | 0.43             | 0.03 | 0.13              | 0.01 |
| B36       | 35956 | 1   | 25   | OPA | + | 63.22            | 0.06 | 21.77                          | 0.01 | 10.50                          | 0.04 | 2.49 | 0.02 | 1.44 | 0.01 | 0.42             | 0.02 | 0.16              | 0.00 |
| B36       | 35970 | 1   | 90   | OPA | - | 62.97            | 0.14 | 22.42                          | 0.13 | 10.19                          | 0.16 | 2.37 | 0.03 | 1.36 | 0.06 | 0.45             | 0.01 | 0.23              | 0.01 |
| B36       | 35958 | 1   | 90   | OPA | + | 63.13            | 0.08 | 21.96                          | 0.07 | 10.74                          | 0.16 | 2.27 | 0.02 | 1.35 | 0.01 | 0.43             | 0.02 | 0.13              | 0.00 |
| B36       | 35971 | 2   | 25   | OPA | - | 61.38            | 0.29 | 22.57                          | 0.27 | 11.25                          | 0.07 | 2.51 | 0.02 | 1.57 | 0.04 | 0.51             | 0.00 | 0.22              | 0.01 |
| B36       | 35959 | 2   | 25   | OPA | + | 61.77            | 0.31 | 22.20                          | 0.03 | 11.09                          | 0.25 | 2.63 | 0.04 | 1.73 | 0.02 | 0.43             | 0.01 | 0.14              | 0.01 |
| B36       | 35973 | 2   | 90   | OPA | - | 62.71            | 0.05 | 22.88                          | 0.03 | 9.78                           | 0.07 | 2.39 | 0.01 | 1.22 | 0.02 | 0.57             | 0.02 | 0.45              | 0.00 |
| B36       | 35961 | 2   | 90   | OPA | + | 62.57            | 0.19 | 22.49                          | 0.15 | 10.18                          | 0.26 | 2.37 | 0.01 | 1.57 | 0.03 | 0.48             | 0.00 | 0.35              | 0.01 |
| B36       | 35944 | 1   | 25   | CAP | - | 62.91            | 0.06 | 22.11                          | 0.06 | 10.43                          | 0.07 | 2.42 | 0.03 | 1.61 | 0.02 | 0.41             | 0.00 | 0.12              | 0.00 |
| B36       | 35932 | 1   | 25   | CAP | + | 63.14            | 0.05 | 21.54                          | 0.07 | 10.35                          | 0.08 | 2.23 | 0.01 | 1.03 | 0.00 | 0.39             | 0.00 | 1.32              | 0.02 |
| B36       | 35946 | 1   | 90   | CAP | - | 60.73            | 0.08 | 26.55                          | 0.22 | 8.49                           | 0.10 | 2.13 | 0.02 | 0.93 | 0.01 | 0.84             | 0.02 | 0.33              | 0.00 |
| B36       | 35934 | 1   | 90   | CAP | + | 60.45            | 0.12 | 24.12                          | 0.22 | 10.10                          | 0.09 | 2.62 | 0.01 | 1.23 | 0.01 | 0.90             | 0.01 | 0.59              | 0.02 |
| B36       | 35947 | 2   | 25   | CAP | - | 61.37            | 0.05 | 24.64                          | 0.30 | 9.47                           | 0.28 | 2.17 | 0.02 | 0.77 | 0.01 | 0.73             | 0.00 | 0.84              | 0.03 |
| B36       | 35935 | 2   | 25   | CAP | + | 62.82            | 0.02 | 21.29                          | 0.04 | 10.70                          | 0.07 | 2.22 | 0.01 | 0.90 | 0.01 | 0.41             | 0.01 | 1.65              | 0.01 |
| B36       | 35949 | 2   | 90   | CAP | - | 60.82            | 0.14 | 26.12                          | 0.17 | 8.52                           | 0.04 | 2.19 | 0.01 | 1.06 | 0.01 | 1.01             | 0.01 | 0.29              | 0.01 |
| B36       | 35937 | 2   | 90   | CAP | + | 59.82            | 0.17 | 23.27                          | 0.15 | 11.04                          | 0.22 | 3.05 | 0.05 | 0.80 | 0.02 | 1.06             | 0.01 | 0.95              | 0.03 |

**Table S6.** Overview of extracted DNA and successful sequencing for the incubated batch-experiments after one and two years. Shown are the concentrations of isolated DNA and the result of the successful amplification of the V4-region from 16S rRNA gene, where “-” means no amplification and “+” means successful amplification and sequencing, S: substrate, OPA: Opalinus clay pore water, CAP: diluted cap rock solution (listed are selected samples from Matschiavelli et al. [43]).

| sample | T [°C] | Porewater | S | 1 year         |                             | 2 years        |                             |
|--------|--------|-----------|---|----------------|-----------------------------|----------------|-----------------------------|
|        |        |           |   | DNA<br>[ng/μl] | 16S rRNA gene<br>sequencing | DNA<br>[ng/μl] | 16S rRNA gene<br>sequencing |
| SD80   | 25     | OPA       | - | 3.1            | -                           | 3.5            | -                           |
| SD80   | 25     | OPA       | + | 89.9           | +                           | 297.2          | +                           |
| SD80   | 90     | OPA       | - | 2.0            | -                           | 3.1            | -                           |
| SD80   | 90     | OPA       | + | 3.1            | -                           | 4.6            | -                           |
| SD80   | 25     | CAP       | - | 1.1            | -                           | 5.3            | -                           |
| SD80   | 25     | CAP       | + | 38.4           | -                           | 4.7            | -                           |
| SD80   | 90     | CAP       | - | 1.8            | -                           | 1.7            | -                           |
| SD80   | 90     | CAP       | + | 3.4            | -                           | 3.7            | -                           |
| B36    | 25     | OPA       | - | 5.6            | -                           | 3.3            | -                           |
| B36    | 25     | OPA       | + | 7.9            | +                           | 9.9            | -                           |
| B36    | 90     | OPA       | - | 3.4            | -                           | 8.2            | -                           |
| B36    | 90     | OPA       | + | 5.7            | -                           | 6.1            | -                           |
| B36    | 25     | CAP       | - | 1.7            | +                           | 3.8            | -                           |
| B36    | 25     | CAP       | + | 4.7            | +                           | 3.0            | -                           |
| B36    | 90     | CAP       | - | 0.4            | -                           | 3.0            | -                           |
| B36    | 90     | CAP       | + | 2.3            | -                           | 6.5            | -                           |

**Table S7.** XRD quantification results of bentonite SD80 using Rietveld-Refinement and XRD parameters of purified smectite SD80 oriented slides (peak position, peak broadening, peak intensity). DUR: duration, SOL: solution, S: substrate, Ant = anatase, Brt = barite, Cal = calcite, Fsp = feldspar, Sme = smectite, Py = pyrite, Qz = quartz,  $R_{wp}$  = weighted residual square sum,  $R_{exp}$  = possible minimum value for  $R_{wp}$ , AD: air dried, EG: ethylene glycol-saturated, FWHM: full-width at half maximum, OPA: Opalinus clay pore water, CAP: diluted cap rock solution.

| Sample ID |       | DUR | T    | SOL | S | Sme   | Fsp   | Qz    | Cal   | Brt   | Ant   | Py    | $R_{wp}$ | $R_{exp}$ | d(001) |      | FWHM(001) |     | max. intensity |      |
|-----------|-------|-----|------|-----|---|-------|-------|-------|-------|-------|-------|-------|----------|-----------|--------|------|-----------|-----|----------------|------|
|           |       | [a] | [°C] |     |   | wt. % | %        | %         | [nm]   |      | [°]       |     | [cps]          |      |
|           |       |     |      |     |   |       |       |       |       |       |       |       |          |           | AD     | EG   | AD        | EG  | AD             | EG   |
| SD80      | raw   | 0   | 20   | -   | - | 89.1  | 7.2   | <1    | <1    | 1.1   | <1    | <1    | 3.4      | 2.1       | 1.45   | 1.68 | 1.8       | 0.6 | 980            | 2420 |
| SD80      | 35974 | 1   | 25   | OPA | - | 87.4  | 9.3   | <1    | <1    | <1    | 1.0   | <1    | 3.7      | 2.1       | 1.49   | 1.69 | 1.0       | 0.6 | 460            | 920  |
| SD80      | 35962 | 1   | 25   | OPA | + | 88.6  | 7.3   | <1    | <1    | 1.1   | 1.0   | <1    | 2.8      | 1.4       | 1.48   | 1.69 | 1.0       | 0.6 | 520            | 920  |
| SD80      | 35976 | 1   | 90   | OPA | - | 88.0  | 8.5   | 1.0   | <1    | 1.0   | 1.1   | <1    | 3.5      | 2.0       | 1.49   | 1.69 | 1.1       | 0.5 | 410            | 770  |
| SD80      | 35964 | 1   | 90   | OPA | + | 87.3  | 8.3   | <1    | 2.2   | <1    | 1.0   | <1    | 4.1      | 1.5       | 1.49   | 1.69 | 1.1       | 0.6 | 800            | 1550 |
| SD80      | 35977 | 2   | 25   | OPA | - | 88.3  | 7.8   | 1.1   | <1    | 1.1   | 1.2   | <1    | 3.2      | 1.5       | 1.51   | 1.69 | 0.9       | 0.5 | 600            | 980  |
| SD80      | 35965 | 2   | 25   | OPA | + | 87.1  | 8.0   | <1    | <1    | 1.6   | 1.3   | <1    | 3.1      | 1.5       | 1.51   | 1.69 | 0.8       | 0.5 | 690            | 1040 |
| SD80      | 35979 | 2   | 90   | OPA | - | 84.6  | 8.3   | <1    | 3.3   | 1.3   | 1.1   | <1    | 3.7      | 1.5       | 1.48   | 1.69 | 1.2       | 0.5 | 550            | 1350 |
| SD80      | 35967 | 2   | 90   | OPA | + | 85.6  | 8.3   | <1    | 3.4   | <1    | 1.2   | <1    | 3.7      | 1.5       | 1.47   | 1.69 | 1.1       | 0.5 | 870            | 1710 |
| SD80      | 35950 | 1   | 25   | CAP | - | 84.3  | 10.8  | <1    | 1.7   | <1    | 1.0   | <1    | 3.6      | 1.9       | 1.49   | 1.69 | 1.0       | 0.6 | 480            | 810  |
| SD80      | 35938 | 1   | 25   | CAP | + | 88.2  | 7.9   | 1.0   | <1    | <1    | <1    | <1    | 2.8      | 1.4       | 1.46   | 1.69 | 2.0       | 0.6 | 340            | 960  |
| SD80      | 35952 | 1   | 90   | CAP | - | 90.9  | 6.6   | <1    | <1    | <1    | <1    | <1    | 3.0      | 2.1       | 1.45   | 1.65 | 1.2       | 0.5 | 220            | 460  |
| SD80      | 35940 | 1   | 90   | CAP | + | 86.4  | 9.0   | <1    | <1    | 1.1   | 1.2   | <1    | 2.8      | 1.4       | 1.49   | 1.67 | 1.0       | 0.6 | 420            | 650  |
| SD80      | 35953 | 2   | 25   | CAP | - | 88.5  | 7.8   | <1    | <1    | <1    | <1    | <1    | 2.8      | 1.4       | 1.42   | 1.69 | 2.2       | 0.6 | 480            | 1630 |
| SD80      | 35941 | 2   | 25   | CAP | + | 87.3  | 8.7   | <1    | <1    | 1.1   | 1.0   | <1    | 2.7      | 1.5       | 1.48   | 1.69 | 2.1       | 0.6 | 490            | 1380 |
| SD80      | 35955 | 2   | 90   | CAP | - | 85.3  | 8.7   | 1.0   | <1    | 2.0   | 1.2   | <1    | 2.5      | 1.4       | 1.48   | 1.67 | 1.0       | 0.6 | 410            | 640  |
| SD80      | 35943 | 2   | 90   | CAP | + | 88.6  | 8.1   | <1    | <1    | <1    | <1    | <1    | 2.5      | 1.4       | 1.49   | 1.67 | 0.9       | 0.6 | 530            | 870  |

**Table S8.** XRD quantification results of bentonite B36 using Rietveld-Refinement and XRD parameters of purified smectite SD80 oriented slides (peak position, peak broadening, peak intensity). DUR: duration, SOL: solution, S: substrate, Ant = anatase, Brt = barite, Cal = calcite, Fsp = feldspar, Sme = smectite, Py = pyrite, Qz = quartz,  $R_{wp}$  = weighted residual square sum,  $R_{exp}$  = possible minimum value for  $R_{wp}$ , AD: air dried, EG: ethylene glycol-saturated, FWHM: full-width at half maximum, OPA: Opalinus clay pore water, CAP: diluted cap rock solution.

| Sample ID |       | DUR | T    | SOL | S | Sme   | Fsp   | Qz    | Kln   | CrS   | Ant   | Cal   | $R_{wp}$ | $R_{exp}$ | d(001) |      | FWHM(001) |     | max. intensity |     |
|-----------|-------|-----|------|-----|---|-------|-------|-------|-------|-------|-------|-------|----------|-----------|--------|------|-----------|-----|----------------|-----|
|           |       | [a] | [°C] |     |   | wt. % | %        | %         | [nm]   |      | [°]       |     | [cps]          |     |
|           |       |     |      |     |   |       |       |       |       |       |       |       |          |           | AD     | EG   | AD        | EG  | AD             | EG  |
| B36       | raw   | 0   | 20   | -   | - | 64.6  | 15.1  | 11.5  | 4.3   | 3.9   | <1    | n/a   | 3.2      | 2.0       | 1.48   | 1.68 | 1.4       | 0.8 | 320            | 510 |
| B36       | 35968 | 1   | 25   | OPA | - | 63.7  | 16.0  | 12.3  | 4.6   | 2.7   | <1    | n/a   | 3.0      | 2.0       | 1.46   | 1.71 | 1.7       | 0.9 | 180            | 360 |
| B36       | 35956 | 1   | 25   | OPA | + | 65.6  | 14.7  | 10.3  | 4.8   | 3.7   | <1    | n/a   | 2.7      | 1.4       | 1.48   | 1.71 | 1.6       | 0.8 | 320            | 570 |
| B36       | 35970 | 1   | 90   | OPA | - | 68.0  | 13.4  | 10.3  | 4.8   | 3.0   | <1    | n/a   | 2.8      | 1.9       | 1.43   | 1.69 | 1.9       | 0.8 | 160            | 350 |
| B36       | 35958 | 1   | 90   | OPA | + | 66.1  | 15.5  | 10.7  | 3.4   | 3.8   | <1    | n/a   | 2.7      | 1.4       | 1.42   | 1.71 | 1.8       | 0.8 | 240            | 570 |
| B36       | 35971 | 2   | 25   | OPA | - | 64.0  | 14.6  | 11.8  | 5.3   | 3.7   | <1    | n/a   | 2.6      | 1.4       | 1.49   | 1.69 | 1.6       | 0.8 | 190            | 350 |
| B36       | 35959 | 2   | 25   | OPA | + | 68.5  | 14.6  | 9.1   | 3.8   | 3.3   | <1    | n/a   | 2.3      | 1.4       | 1.49   | 1.71 | 1.5       | 0.8 | 360            | 620 |
| B36       | 35973 | 2   | 90   | OPA | - | 62.1  | 15.6  | 13.5  | 4.5   | 3.7   | <1    | n/a   | 2.6      | 1.4       | 1.38   | 1.70 | 2.1       | 0.8 | 150            | 340 |
| B36       | 35961 | 2   | 90   | OPA | + | 61.2  | 15.5  | 14.4  | 4.6   | 3.7   | <1    | n/a   | 2.8      | 1.5       | 1.40   | 1.71 | 2.0       | 0.8 | 200            | 510 |
| B36       | 35944 | 1   | 25   | CAP | - | 59.0  | 16.1  | 15.8  | 4.7   | 3.6   | <1    | n/a   | 3.2      | 2.1       | 1.48   | 1.69 | 1.6       | 0.9 | 220            | 360 |
| B36       | 35932 | 1   | 25   | CAP | + | 69.2  | 14.3  | 8.7   | 3.9   | 3.2   | <1    | n/a   | 2.6      | 1.4       | 1.33   | 1.72 | 2.3       | 1.0 | 170            | 400 |
| B36       | 35946 | 1   | 90   | CAP | - | 64.6  | 14.4  | 12.4  | 4.5   | 3.6   | <1    | n/a   | 3.1      | 2.0       | 1.39   | 1.69 | 2.2       | 0.9 | 90             | 180 |
| B36       | 35934 | 1   | 90   | CAP | + | 62.2  | 16.0  | 13.5  | 3.4   | 4.1   | <1    | n/a   | 2.7      | 1.4       | 1.46   | 1.67 | 1.9       | 1.0 | 110            | 170 |
| B36       | 35947 | 2   | 25   | CAP | - | 62.9  | 15.8  | 12.6  | 4.3   | 3.7   | <1    | n/a   | 2.5      | 1.4       | 1.28   | 1.66 | 1.9       | 0.9 | 80             | 200 |
| B36       | 35935 | 2   | 25   | CAP | + | 62.3  | 16.1  | 12.7  | 4.5   | 3.6   | <1    | n/a   | 2.5      | 1.4       | 1.30   | 1.70 | 2.3       | 1.0 | 330            | 800 |
| B36       | 35949 | 2   | 90   | CAP | - | 58.8  | 16.9  | 14.9  | 4.6   | 4.3   | <1    | n/a   | 2.8      | 1.4       | 1.34   | 1.66 | 2.1       | 1.1 | 80             | 120 |
| B36       | 35937 | 2   | 90   | CAP | + | 66.9  | 15.5  | 8.9   | 4.2   | 3.8   | <1    | n/a   | 2.5      | 1.4       | 1.42   | 1.64 | 2.1       | 1.1 | 100            | 150 |



**Table S9.** Layer charge distribution of smectite SD80 (rounded mean values after mineral formula calculation). DUR: duration, SOL: solution, S: substrate, TET: tetrahedral, OCT: octahedral, OPA: Opalinus clay pore water, CAP: diluted cap rock solution.

| Sample ID |       | DUR | T    | SOL | S | tetrahedral      |                  | octahedral       |                  |                  | interlayer       |                  |                 |                | TET    | OCT    | total | %TET   |
|-----------|-------|-----|------|-----|---|------------------|------------------|------------------|------------------|------------------|------------------|------------------|-----------------|----------------|--------|--------|-------|--------|
|           |       | [a] | [°C] |     |   | Si <sup>4+</sup> | Al <sup>3+</sup> | Al <sup>3+</sup> | Fe <sup>3+</sup> | Mg <sup>2+</sup> | Ca <sup>2+</sup> | Mg <sup>2+</sup> | Na <sup>+</sup> | K <sup>+</sup> | charge | charge | LC    | charge |
| SD80      | raw   | 0   | 20   | -   | - | 3.94             | 0.06             | 1.44             | 0.26             | 0.30             | 0.09             | 0.06             | 0.01            | 0.03           | -0.06  | -0.30  | -0.36 | 17     |
| SD80      | 35974 | 1   | 25   | OPA | - | 3.94             | 0.06             | 1.43             | 0.25             | 0.32             | 0.14             | 0.02             | 0.02            | 0.03           | -0.06  | -0.32  | 0.38  | 16     |
| SD80      | 35962 | 1   | 25   | OPA | + | 3.95             | 0.05             | 1.45             | 0.24             | 0.31             | 0.12             | 0.04             | 0.01            | 0.03           | -0.05  | -0.31  | -0.37 | 14     |
| SD80      | 35976 | 1   | 90   | OPA | - | 3.95             | 0.05             | 1.44             | 0.24             | 0.32             | 0.12             | 0.04             | 0.01            | 0.03           | -0.05  | -0.32  | -0.37 | 14     |
| SD80      | 35964 | 1   | 90   | OPA | + | 3.92             | 0.08             | 1.44             | 0.23             | 0.33             | 0.14             | 0.05             | 0.01            | 0.03           | -0.08  | -0.33  | -0.41 | 20     |
| SD80      | 35977 | 2   | 25   | OPA | - | 3.92             | 0.08             | 1.44             | 0.23             | 0.33             | 0.14             | 0.04             | 0.02            | 0.03           | -0.08  | -0.33  | -0.41 | 20     |
| SD80      | 35965 | 2   | 25   | OPA | + | 3.91             | 0.09             | 1.46             | 0.23             | 0.31             | 0.13             | 0.05             | 0.01            | 0.03           | -0.09  | -0.31  | -0.40 | 23     |
| SD80      | 35979 | 2   | 90   | OPA | - | 3.93             | 0.07             | 1.46             | 0.22             | 0.32             | 0.11             | 0.05             | 0.03            | 0.03           | -0.07  | -0.32  | -0.39 | 18     |
| SD80      | 35967 | 2   | 90   | OPA | + | 3.93             | 0.07             | 1.46             | 0.22             | 0.32             | 0.12             | 0.05             | 0.02            | 0.03           | -0.07  | -0.32  | -0.39 | 18     |
| SD80      | 35950 | 1   | 25   | CAP | - | 3.94             | 0.06             | 1.50             | 0.21             | 0.29             | 0.11             | 0.04             | 0.01            | 0.03           | -0.06  | -0.29  | -0.35 | 17     |
| SD80      | 35938 | 1   | 25   | CAP | + | 3.91             | 0.09             | 1.45             | 0.23             | 0.32             | 0.11             | 0.01             | 0.12            | 0.03           | -0.09  | -0.32  | -0.41 | 22     |
| SD80      | 35952 | 1   | 90   | CAP | - | 3.92             | 0.08             | 1.48             | 0.22             | 0.30             | 0.12             | 0.05             | 0.01            | 0.04           | -0.08  | -0.30  | -0.38 | 21     |
| SD80      | 35940 | 1   | 90   | CAP | + | 3.91             | 0.09             | 1.47             | 0.23             | 0.31             | 0.12             | 0.04             | 0.03            | 0.05           | -0.09  | -0.31  | -0.39 | 23     |
| SD80      | 35953 | 2   | 25   | CAP | - | 3.93             | 0.07             | 1.44             | 0.24             | 0.32             | 0.11             | 0.00             | 0.13            | 0.03           | -0.07  | -0.32  | -0.39 | 18     |
| SD80      | 35941 | 2   | 25   | CAP | + | 3.92             | 0.08             | 1.45             | 0.23             | 0.32             | 0.11             | 0.01             | 0.12            | 0.03           | -0.08  | -0.32  | -0.40 | 20     |
| SD80      | 35955 | 2   | 90   | CAP | - | 3.89             | 0.11             | 1.43             | 0.26             | 0.31             | 0.12             | 0.05             | 0.03            | 0.05           | -0.11  | -0.31  | -0.42 | 26     |
| SD80      | 35943 | 2   | 90   | CAP | + | 3.91             | 0.09             | 1.44             | 0.24             | 0.31             | 0.12             | 0.04             | 0.03            | 0.05           | -0.09  | -0.31  | -0.41 | 22     |

**Table S10.** Layer charge distribution of smectite B36 (rounded mean values after mineral formula calculation). DUR: duration, SOL: solution, S: substrate, TET: tetrahedral, OCT: octahedral, OPA: Opalinus clay pore water, CAP: diluted cap rock solution.

| Sample ID |       | DUR | T    | SOL | S | tetrahedral      |                  | octahedral       |                  |                  | interlayer       |                  |                 |                | TET    | OCT    | total | %TET   |
|-----------|-------|-----|------|-----|---|------------------|------------------|------------------|------------------|------------------|------------------|------------------|-----------------|----------------|--------|--------|-------|--------|
|           |       | [a] | [°C] |     |   | Si <sup>4+</sup> | Al <sup>3+</sup> | Al <sup>3+</sup> | Fe <sup>3+</sup> | Mg <sup>2+</sup> | Ca <sup>2+</sup> | Mg <sup>2+</sup> | Na <sup>+</sup> | K <sup>+</sup> | charge | charge | LC    | charge |
| B36       | raw   | 0   | 20   | -   | - | 3.79             | 0.21             | 1.37             | 0.46             | 0.16             | 0.11             | 0.06             | 0.01            | 0.03           | -0.21  | -0.16  | -0.38 | 56     |
| B36       | 35968 | 1   | 25   | OPA | - | 3.80             | 0.20             | 1.39             | 0.47             | 0.15             | 0.09             | 0.06             | 0.02            | 0.03           | -0.20  | -0.15  | -0.35 | 57     |
| B36       | 35956 | 1   | 25   | OPA | + | 3.81             | 0.19             | 1.36             | 0.48             | 0.17             | 0.09             | 0.06             | 0.02            | 0.03           | -0.19  | -0.17  | -0.35 | 54     |
| B36       | 35970 | 1   | 90   | OPA | - | 3.79             | 0.21             | 1.39             | 0.46             | 0.15             | 0.09             | 0.06             | 0.03            | 0.03           | -0.21  | -0.15  | -0.36 | 58     |
| B36       | 35958 | 1   | 90   | OPA | + | 3.81             | 0.19             | 1.37             | 0.49             | 0.15             | 0.09             | 0.06             | 0.01            | 0.03           | -0.19  | -0.15  | -0.34 | 56     |
| B36       | 35971 | 2   | 25   | OPA | - | 3.72             | 0.28             | 1.34             | 0.51             | 0.15             | 0.10             | 0.08             | 0.03            | 0.04           | -0.28  | -0.15  | -0.42 | 67     |
| B36       | 35959 | 2   | 25   | OPA | + | 3.74             | 0.26             | 1.33             | 0.51             | 0.16             | 0.11             | 0.07             | 0.02            | 0.03           | -0.26  | -0.16  | -0.42 | 62     |
| B36       | 35973 | 2   | 90   | OPA | - | 3.78             | 0.22             | 1.40             | 0.44             | 0.15             | 0.08             | 0.06             | 0.05            | 0.04           | -0.22  | -0.15  | -0.38 | 58     |
| B36       | 35961 | 2   | 90   | OPA | + | 3.78             | 0.22             | 1.38             | 0.46             | 0.16             | 0.10             | 0.05             | 0.04            | 0.04           | -0.22  | -0.16  | -0.38 | 58     |
| B36       | 35944 | 1   | 25   | CAP | - | 3.79             | 0.21             | 1.37             | 0.47             | 0.16             | 0.10             | 0.06             | 0.01            | 0.03           | -0.21  | -0.16  | -0.37 | 57     |
| B36       | 35932 | 1   | 25   | CAP | + | 3.82             | 0.18             | 1.35             | 0.47             | 0.18             | 0.07             | 0.02             | 0.15            | 0.03           | -0.18  | -0.18  | -0.36 | 50     |
| B36       | 35946 | 1   | 90   | CAP | - | 3.65             | 0.35             | 1.53             | 0.38             | 0.08             | 0.06             | 0.11             | 0.04            | 0.06           | -0.35  | -0.08  | -0.43 | 81     |
| B36       | 35934 | 1   | 90   | CAP | + | 3.67             | 0.33             | 1.31             | 0.54             | 0.15             | 0.05             | 0.09             | 0.09            | 0.08           | -0.33  | -0.15  | -0.48 | 69     |
| B36       | 35947 | 2   | 25   | CAP | - | 3.70             | 0.30             | 1.45             | 0.43             | 0.12             | 0.05             | 0.08             | 0.10            | 0.06           | -0.30  | -0.12  | -0.41 | 73     |
| B36       | 35935 | 2   | 25   | CAP | + | 3.81             | 0.19             | 1.33             | 0.49             | 0.18             | 0.06             | 0.02             | 0.19            | 0.03           | -0.19  | -0.18  | -0.38 | 50     |
| B36       | 35949 | 2   | 90   | CAP | - | 3.66             | 0.34             | 1.51             | 0.39             | 0.10             | 0.07             | 0.10             | 0.03            | 0.08           | -0.34  | -0.10  | -0.44 | 77     |
| B36       | 35937 | 2   | 90   | CAP | + | 3.65             | 0.35             | 1.32             | 0.51             | 0.17             | 0.05             | 0.11             | 0.11            | 0.08           | -0.35  | -0.17  | -0.52 | 67     |
